# Supplementary material for: Integrated evolutionary analysis reveals antimicrobial peptides with limited resistance
Source: PubMed Central journal article supplement (PMC6778101; doi:10.1038/s41467-019-12364-6), 2019-10-04
Supplement: 41467_2019_12364_MOESM1_ESM.pdf [file 41467_2019_12364_MOESM1_ESM.pdf]

**Supplementary Information**

**Integrated evolutionary analysis reveals antimicrobial peptides with limited  
resistance**

Spohn and Daruka *et al.*

## Supplementary Tables

**Supplementary Table 1 –AMPs used in the laboratory evolution experiments and the genomic overexpression screen.** The AMPs also used in the metagenomic screen are indicated by asterisk (\*).

| Antimicrobial peptide |                                              | Source                      | Sequence                                  | 3D structure                                   |
|-----------------------|----------------------------------------------|-----------------------------|-------------------------------------------|------------------------------------------------|
| Abbrev.               | Name                                         |                             |                                           |                                                |
| BAC5                  | Bactenecin 5                                 | Bovine                      | RFRPPIRRPPIRPPFYPPFRPPIRPPIFPPIRPPFRPLGPF | rich in P and R <sup>1</sup>                   |
| CAP18                 | Rabbit 18-kDa cationic antimicrobial protein | Rabbit                      | GLRKRLRKFNRNKKIKELKKIGQKIQGFVPLAPRTDY     | helix <sup>2</sup>                             |
| CP1*                  | Cecropin P1                                  | Small intestinal roundworms | SWLSKTAKKLENSAKKRRISEGIAIAIQGGPR          | helix <sup>3</sup>                             |
| HBD3                  | Human beta-defensin -3                       | Human                       | GIINTLQKYYRVRGGRAVLSLPKEEQIGKSTRGRKRKK    | combined helix and beta structure <sup>4</sup> |
| IND*                  | Indolicidin                                  | Bovine                      | ILPWKWPWWPWR                              | Non helix beta <sup>5</sup>                    |
| LL37                  | LL-37 cathelicidin                           | Human                       | LLGDFFRKSKEKIGKEFKRIVQRIKDFLRNLPRTES      | helix <sup>6</sup>                             |
| PEX                   | Pexiganan                                    | Synthetic                   | GIGKFLKKAKKFGKAFVKILKK                    | helix <sup>7</sup>                             |
| PGLA                  | Peptide Glycine-Leucine Amide                | Frog                        | GMASKAGAIAGKIAKVALKAL                     | helix <sup>8</sup>                             |
| PLEU                  | Pleurocidin                                  | Fish                        | GWGSFFKAAHVGKHKVGAALTHYL                  | helix <sup>9</sup>                             |
| PR39                  | PR-39                                        | Pig                         | RRRPRPPYLPRRPPPPFPRLPPRIPPGFPPRFPPRF      | rich in P and R <sup>10</sup>                  |
| PROA                  | Protamine                                    | Fish                        | TSSPPAAVVRRRRRRRRRRRRRRRRRR               | rich in R <sup>11</sup>                        |
| PXB                   | Polymyxin B                                  | Bacteria                    | KTKKKFLKKT                                | beta turn and/or gamma turn <sup>12</sup>      |
| R8*                   | R8                                           | Synthetic                   | FLGKVKLASKVFKAVFGKV                       | unknown <sup>13</sup>                          |
| TPII*                 | Tachyplesin II                               | Crab                        | RWCFRVCYRGICYRKCR                         | two disulfide bridges <sup>14</sup>            |

**Supplementary Table 2 – Antibiotics used in the laboratory evolution experiments and the genomic overexpression screen.** The antibiotics also used in the metagenomic screen are indicated by asterisk (\*).

| Antibiotic      |         | Mode of action                          | Type of action |
|-----------------|---------|-----------------------------------------|----------------|
| Name            | Abbrev. |                                         |                |
| Tetracycline    | TET     | Protein synthesis, 30S                  | Bacteriostatic |
| Doxycycline     | DOX     | Protein synthesis, 30S                  | Bacteriostatic |
| Chloramphenicol | CHL*    | Protein synthesis, 50S                  | Bacteriostatic |
| Erythromycin    | ERY     | Protein synthesis, 50S                  | Bacteriostatic |
| Trimethoprim    | TRM*    | Folic acid biosynthesis                 | Bacteriostatic |
| Ampicillin      | APC     | Cell wall                               | Bactericidal   |
| Cefoxitin       | FOX     | Cell wall                               | Bactericidal   |
| Nalidixic acid  | NAL     | Gyrase                                  | Bactericidal   |
| Ciprofloxacin   | CPR*    | Gyrase                                  | Bactericidal   |
| Nitrofurantoin  | NIT     | Multiple mechanisms                     | Bactericidal   |
| Tobramycin      | TOB*    | Protein synthesis, 30S, Aminoglycosides | Bactericidal   |
| Kanamycin       | KAN     | Protein synthesis, 30S, Aminoglycosides | Bactericidal   |

**Supplementary Table 3– Fold change in minimum inhibitory concentration (MIC) as a result of artificial gene amplification.** Fold changes were calculated by dividing the MIC provided by the pooled plasmids of the ASKA library (that comprises every *E. coli* ORF cloned into an expression vector) with the MIC of *E. coli* K-12 BW25113 carrying the empty plasmid of the ASKA library. Chloramphenicol (CHL) was excluded from the experiment as it is the selection marker for the ASKA plasmids. Three biological replicates were used. For AMP and antibiotic abbreviations, see Supplementary Table 1 and Supplementary Table 2, respectively.

| AMP/AB | MIC value ( $\mu\text{g.mL}^{-1}$ ) of <i>E. coli</i> K-12 BW25113 carrying the empty plasmid of the ASKA library |             |             | MIC value ( $\mu\text{g.mL}^{-1}$ ) of <i>E. coli</i> K-12 BW25113 carrying the pooled plasmids of the ASKA library |             |             | Average fold change of the 3 replicates |
|--------|-------------------------------------------------------------------------------------------------------------------|-------------|-------------|---------------------------------------------------------------------------------------------------------------------|-------------|-------------|-----------------------------------------|
|        | Replicate 1                                                                                                       | Replicate 2 | Replicate 3 | Replicate 1                                                                                                         | Replicate 2 | Replicate 3 |                                         |
| BAC5   | 5.79                                                                                                              | 5.79        | 5.79        | 4.82                                                                                                                | 5.79        | 4.82        | 0.89                                    |
| CAP18  | 24.11                                                                                                             | 20.09       | 24.11       | 24.11                                                                                                               | 24.11       | 24.11       | 1.07                                    |
| CP1    | 2.31                                                                                                              | 2.31        | 2.31        | 2.31                                                                                                                | 2.31        | 2.31        | 1.00                                    |
| HBD3   | 195.36                                                                                                            | 195.36      | 281.31      | 405.09                                                                                                              | 337.58      | 281.31      | 1.60                                    |
| IND    | 28.93                                                                                                             | 28.93       | 28.93       | 28.93                                                                                                               | 28.93       | 28.93       | 1.00                                    |
| LL37   | 14.45                                                                                                             | 12.04       | 14.45       | 14.45                                                                                                               | 17.34       | 14.45       | 1.15                                    |
| PEX    | 12.06                                                                                                             | 17.36       | 14.47       | 14.47                                                                                                               | 17.36       | 17.36       | 1.13                                    |
| PGLA   | 83.72                                                                                                             | 83.72       | 100.47      | 120.56                                                                                                              | 120.56      | 120.56      | 1.36                                    |
| PLEU   | 40.4                                                                                                              | 88.76       | 31.08       | 52.52                                                                                                               | 40.4        | 52.52       | 1.15                                    |
| PR39   | 5.79                                                                                                              | 5.79        | 5.79        | 5.79                                                                                                                | 5.79        | 5.79        | 1.00                                    |
| PROA   | 126.51                                                                                                            | 126.51      | 442.78      | 126.51                                                                                                              | 36.15       | 442.78      | 0.76                                    |
| PXB    | 3.18                                                                                                              | 3.18        | 3.18        | 3.18                                                                                                                | 3.18        | 3.18        | 1.00                                    |
| R8     | 11.57                                                                                                             | 11.57       | 11.57       | 11.57                                                                                                               | 11.57       | 9.46        | 0.94                                    |
| TPII   | 3.48                                                                                                              | 3.48        | 3.48        | 3.48                                                                                                                | 3.48        | 3.48        | 1.00                                    |
| APC    | 4                                                                                                                 | 4           | 4           | 256                                                                                                                 | 256         | 256         | 64.00                                   |
| CPR    | 0.0057                                                                                                            | 0.0057      | 0.0057      | 0.0118                                                                                                              | 0.0142      | 0.0142      | 2.35                                    |
| DOX    | 0.56                                                                                                              | 0.43        | 0.56        | 1.59                                                                                                                | 1.59        | 1.59        | 3.14                                    |
| ERY    | 10.98                                                                                                             | 14.28       | 14.28       | 18.56                                                                                                               | 24.13       | 24.13       | 1.69                                    |
| FOX    | 6.07                                                                                                              | 6.07        | 6.07        | 69.19                                                                                                               | 69.19       | 69.19       | 11.39                                   |
| KAN    | 9.65                                                                                                              | 7.43        | 7.43        | 12.55                                                                                                               | 9.65        | 12.55       | 1.43                                    |
| NAL    | 0.37                                                                                                              | 0.37        | 0.37        | 1.05                                                                                                                | 1.05        | 1.05        | 2.86                                    |
| NIT    | 6.53                                                                                                              | 6.53        | 6.53        | 14.69                                                                                                               | 14.69       | 6.53        | 1.83                                    |
| TET    | 0.62                                                                                                              | 0.62        | 0.62        | 1.29                                                                                                                | 1.07        | 1.07        | 1.84                                    |
| TOB    | 1.49                                                                                                              | 1.24        | 1.49        | 2.15                                                                                                                | 2.58        | 2.58        | 1.75                                    |
| TRM    | 2                                                                                                                 | 2           | 2           | 128                                                                                                                 | 64          | 64          | 42.67                                   |

**Supplementary Table 4 – Antimicrobial activity of TPII and CP1 against a set of 20 pathogenic strains.**

|                | Strain                                                                   | MIC ( $\mu\text{M}$ ) |         |         |
|----------------|--------------------------------------------------------------------------|-----------------------|---------|---------|
|                |                                                                          | CP1                   | TPII    |         |
| Gram-negatives | <i>Escherichia coli</i>                                                  | ATCC 25922            | 1.2     | 1.8     |
|                | <i>Escherichia coli</i>                                                  | ATCC 35218            | 1.2     | 1.8     |
|                | <i>Escherichia coli</i>                                                  | NCTC 13351            | 0.6-1.2 | 0.9-1.8 |
|                | <i>Escherichia coli</i>                                                  | ATCC BAA 2469         | 1.2     | 0.9     |
|                | <i>Escherichia coli</i>                                                  | ATCC BAA 2340         | 1.2     | 0.9-1.8 |
|                | <i>Shigella sonnei</i>                                                   | HNCMB 25021           | 0.6-1.2 | 0.9     |
|                | <i>Shigella flexneri</i>                                                 | HNCMB 20018           | 1.2     | 1.8     |
|                | <i>Enterobacter cloacae</i> subsp. <i>cloacae</i>                        | ATCC 13047            | >9.6    | 3.5     |
|                | <i>Salmonella enterica</i> subsp. <i>enterica</i><br>serovar Typhimurium | LT2                   | 1.2-2.4 | 1.8     |
|                | <i>Salmonella enteritidis</i>                                            | HNCMB 10092           | 1.2     | 1.8     |
|                | <i>Klebsiella pneumoniae</i>                                             | ATCC 10031            | 1.2-2.4 | 0.9-1.8 |
|                | <i>Klebsiella pneumoniae</i>                                             | NCTC 13440            | 1.2     | 1.8     |
|                | <i>Klebsiella pneumoniae</i> subsp.<br><i>pneumoniae</i>                 | ATCC 700603           | 2.4     | 1.8     |
|                | <i>Acinetobacter baumannii</i>                                           | ATCC 17978            | 0.6-1.2 | 1.8     |
|                | <i>Pseudomonas aeruginosa</i>                                            | ATCC 27853            | 2.4     | 1.8     |
| Gram-positives | <i>Enterococcus faecium</i>                                              | ATCC 700221           | >9.6    | 3.5     |
|                | <i>Streptococcus pyogenes</i>                                            | ATCC 19653            | >9.6    | 0.9     |
|                | <i>Staphylococcus aureus</i> subsp. <i>aureus</i>                        | ATCC 25923            | >9.6    | 3.5     |
|                | <i>Staphylococcus aureus</i> subsp. <i>aureus</i>                        | ATCC 29213            | >9.6    | 3.5     |
|                | <i>Methicillin-resistant Staphylococcus aureus</i> subsp. <i>aureus</i>  | ATCC 43300            | >9.6    | 3.5     |

**Supplementary Table 5 –Haemolysis percentage at different AMP concentrations.** Optical density (OD) was measured at 565 nm. Melittin (50 µg.mL<sup>-1</sup>) and TBS buffer were used as positive (100 % haemolysis) and negative (no haemolysis) controls, respectively. Haemolytic effect of each peptide at each concentration was calculated as follows: Haemolysis percentage = (Compound OD<sub>565nm</sub> - TBS OD<sub>565nm</sub>) X 100 / (Melittin OD<sub>565nm</sub> - TBS OD<sub>565nm</sub>).

| Concentration<br>(µg.mL <sup>-1</sup> ) | Haemolysis percentage |     |     |     |
|-----------------------------------------|-----------------------|-----|-----|-----|
|                                         | TPII                  | CP1 | IND | R8  |
| 2500                                    | 33                    | 4   | 74  | 131 |
| 1250                                    | 21                    | 3   | 89  | 139 |
| 625                                     | 15                    | 2   | 56  | 128 |
| 312                                     | 10                    | 5   | 14  | 107 |
| 156                                     | 6                     | 1   | 4   | 55  |
| 78                                      | 3                     | 1   | 3   | 24  |
| 39                                      | 3                     | 1   | 2   | 9   |
| 19.5                                    | 2                     | 1   | 2   | 3   |
| 9.75                                    | 2                     | 1   | 2   | 2   |
| 0                                       | 1                     | 1   | 1   | 2   |

**Supplementary Table 6 -Activity/toxicity index (ATI) of TPII and CP1.** ATI is calculated as the ratio between the concentration causing 10% haemolysis (minimum haemolytic concentration, MHC) and the median of MICs (MM) in *E. coli* K12.

|                               | TPII   | CP1     |
|-------------------------------|--------|---------|
| MHC<br>(µg.mL <sup>-1</sup> ) | 312    | >2500   |
| MM<br>(µg.mL <sup>-1</sup> )  | 2.01   | 2.95    |
| ATI                           | 155.22 | >847.45 |

**Supplementary Table 7- Effect of incubation time on the minimum inhibitory concentration (MIC) of AMPs.** We tested whether the prolonged incubation time can affect the MIC of AMPs. To test this, two sets of **AMP containing** MIC plates were prepared in parallel. The first set was immediately inoculated with *E.coli* K-12 BW25113, while the second set was pre-incubated 72 hours before inoculation with the same strain. We measured the change in the MIC after 24, 48 and 72 hours and no differences were observed in the MIC between freshly prepared and pre-incubated plates.

| Time allowed for bacterial growth (hours) | MIC (freshly prepared AMP) |      |      | MIC (pre-incubated AMP) |      |      |
|-------------------------------------------|----------------------------|------|------|-------------------------|------|------|
|                                           | 24                         | 48   | 72   | 24                      | 48   | 72   |
| TPII ( $\mu\text{g.mL}^{-1}$ )            | 5                          | 5    | 5    | 6                       | 6    | 6    |
| PXB ( $\mu\text{g.mL}^{-1}$ )             | 4.2                        | 4.2  | 4.2  | 5                       | 5    | 5    |
| LL37 ( $\mu\text{g.mL}^{-1}$ )            | 14.5                       | 17.4 | 17.4 | 17.4                    | 17.4 | 17.4 |
| BAC5 ( $\mu\text{g.mL}^{-1}$ )            | 14.5                       | 14.5 | 14.5 | 14.5                    | 14.5 | 14.5 |

## Supplementary Figures

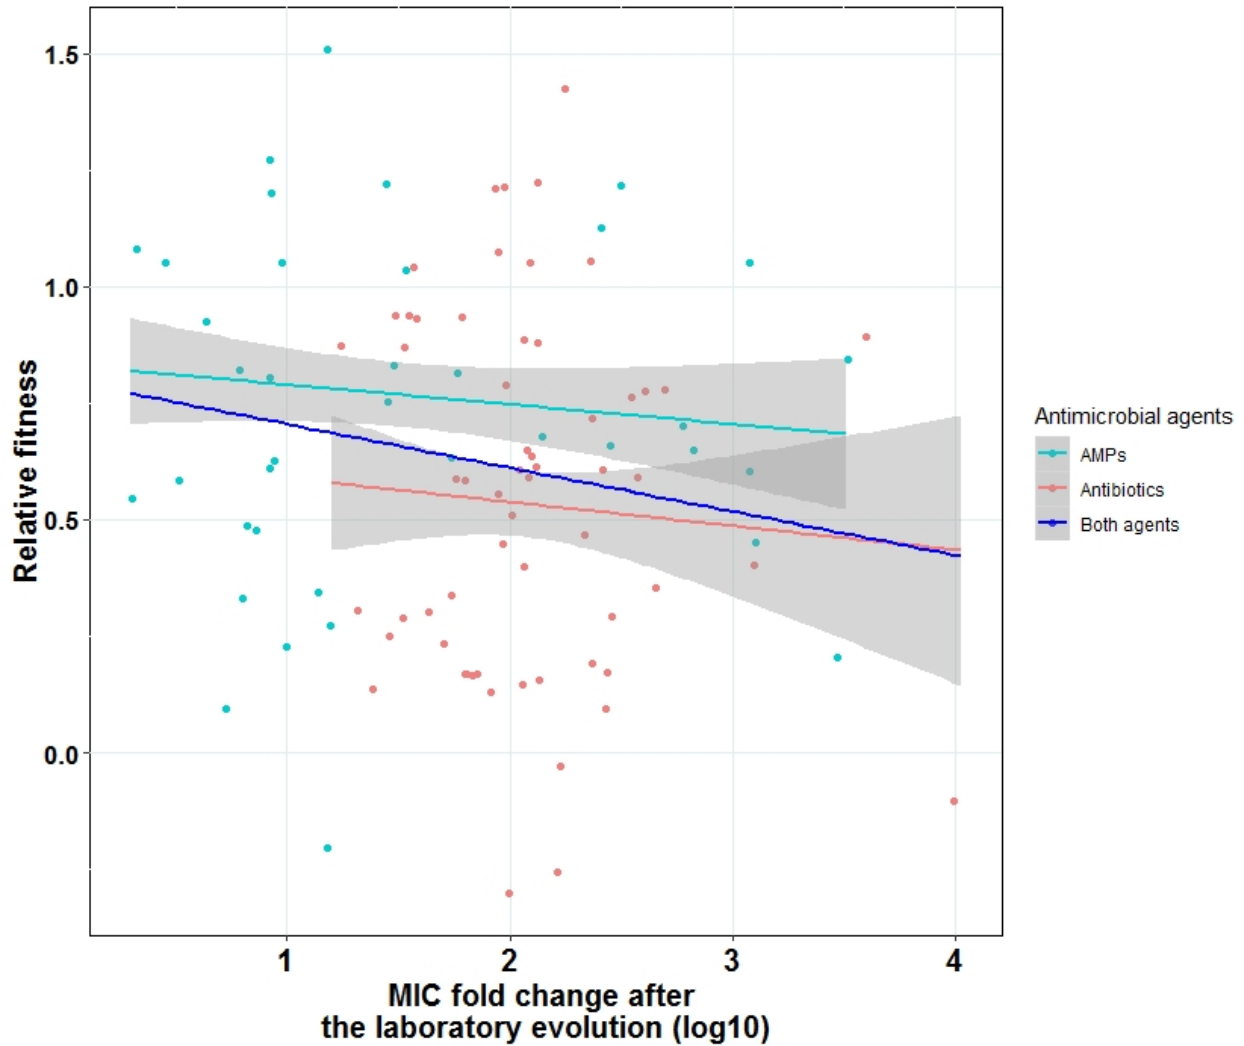

**Supplementary Figure 1- Correlation between relative fitness and minimal inhibitory concentration (MIC) fold change.** The figure shows a weak correlation between MIC fold change and relative fitness (spearman's  $\rho = -0.24$ ,  $P = 0.016$ ,  $N=98$ ). The weak correlation disappears when we control for the antimicrobial agents ( $P = 0.6$  and  $P = 0.39$  for antibiotics ( $N=60$ ) and AMPs ( $N=38$ ), respectively). Source data are provided as a Source Data file.



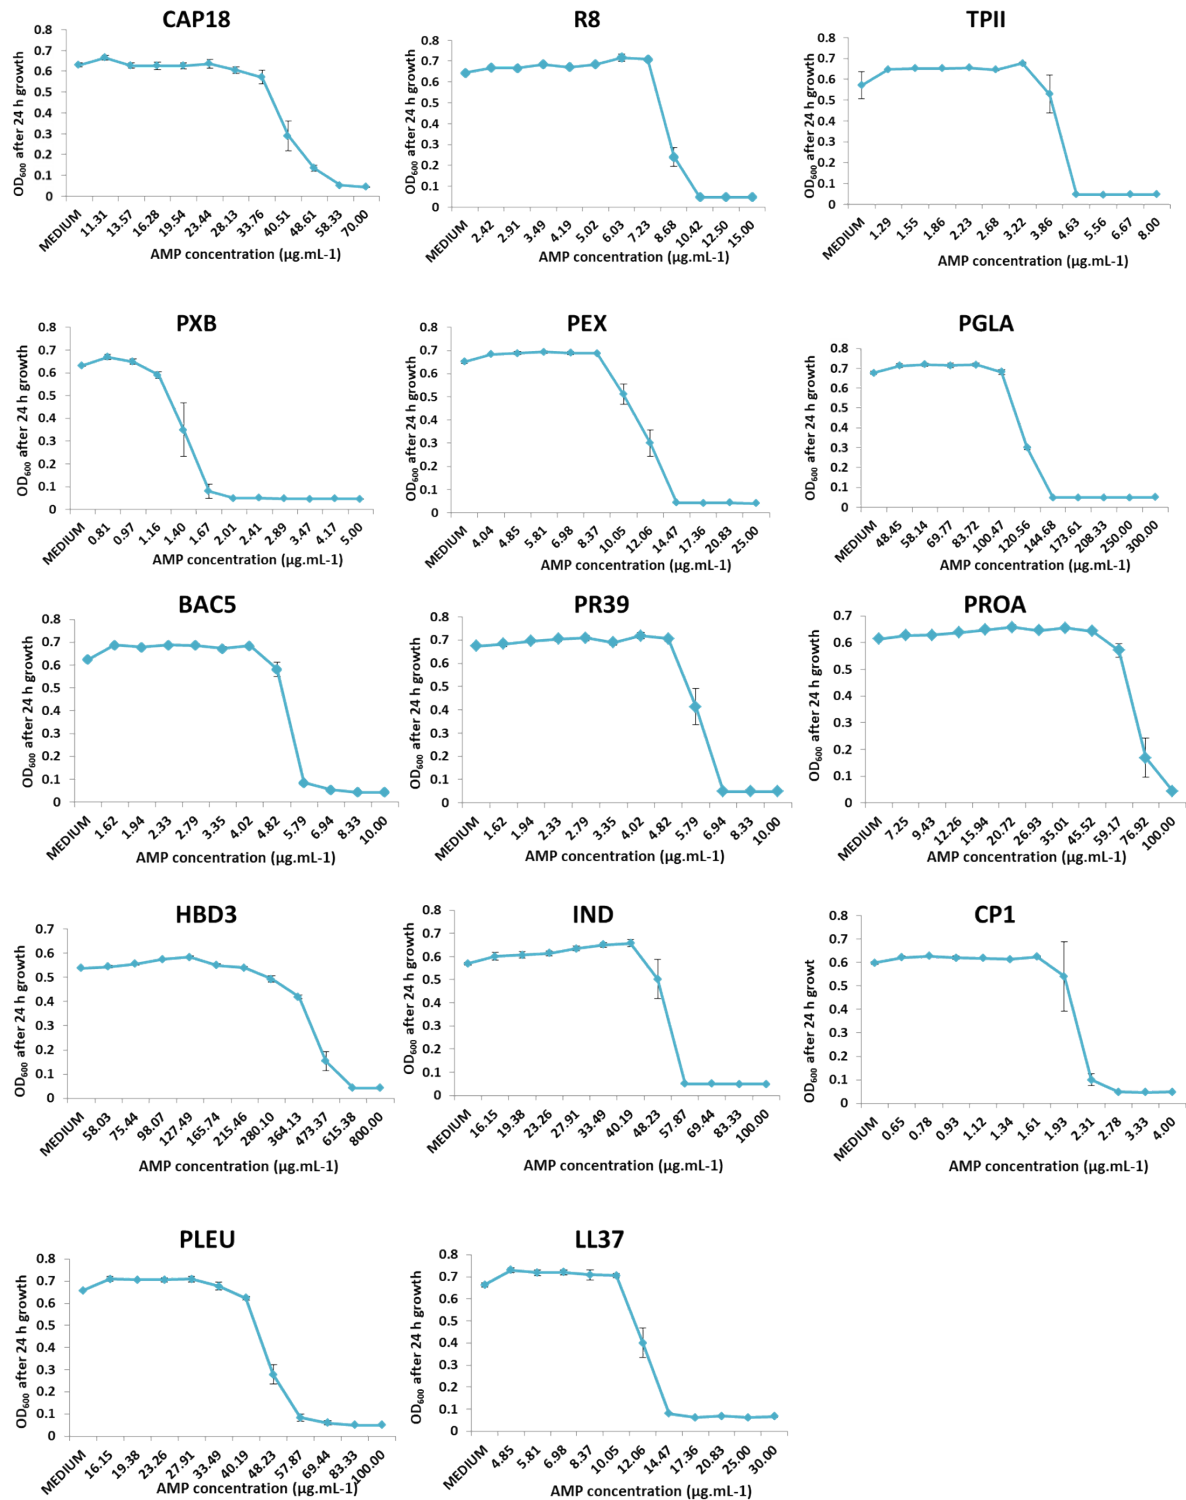

**Supplementary Figure 2A-** Dose-response curves of *E. coli* K-12 BW25113 strain against AMPs. For abbreviations, see Supplementary Table 1. Each data point shows the mean  $\pm$  s.e.m. of three biological replicate. Source data are provided as a Source Data file.

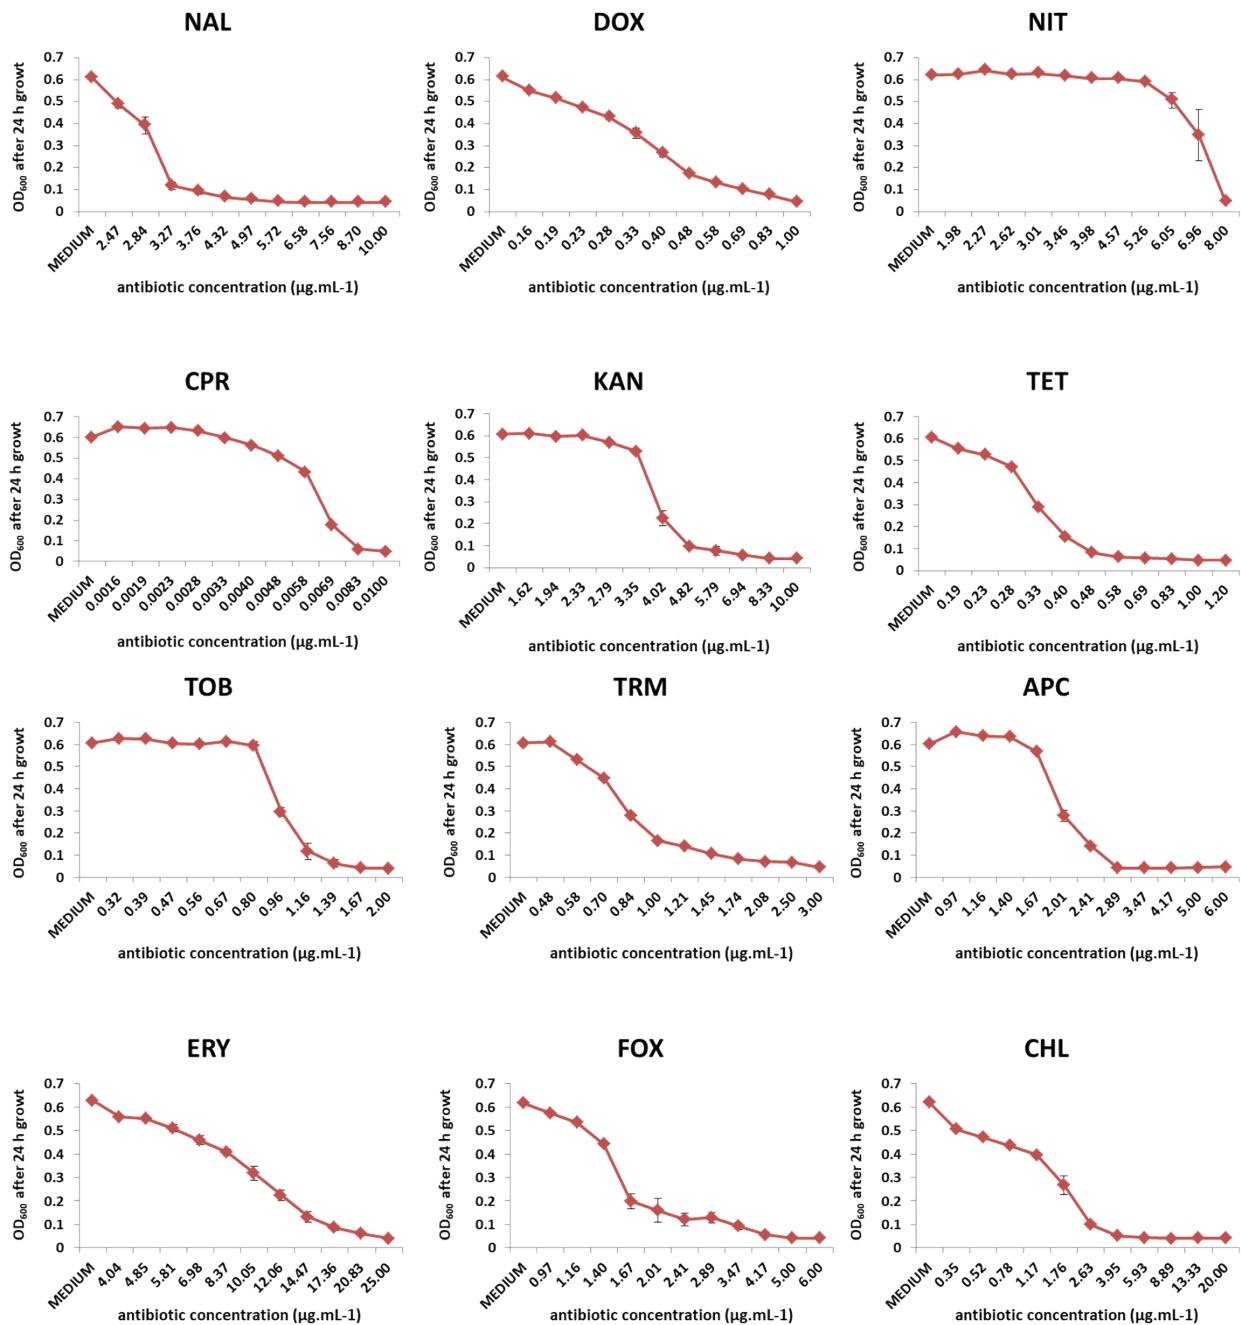

**Supplementary Figure 2B- Dose-response curves of *E. coli* K-12 BW25113 strain against antibiotics.** For abbreviations see Supplementary Table 2. Each data point shows the mean  $\pm$  s.e.m. of three biological replicate. Source data are provided as a Source Data file.

## Supplementary References

1. Gennaro, R., Skerlavaj, B. & Romeo, D. Purification, composition, and activity of two bactericins, antibacterial peptides of bovine neutrophils. *Infect. Immun.* **57**, 3142–3146 (1989).
2. Chen, C. *et al.* The solution structure of the active domain of CAP18 - a lipopolysaccharide binding protein from rabbit leukocytes. *FEBS Lett.* **370**, 46–52 (1995).
3. SIPOS, D., ANDERSSON, M. & EHRENBORG, A. The structure of the mammalian antibacterial peptide cecropin P1 in solution, determined by proton-NMR. *Eur. J. Biochem.* **209**, 163–169 (1992).
4. Schibli, D. J. *et al.* The solution structures of the human  $\beta$ -defensins lead to a better understanding of the potent bactericidal activity of HBD3 against *Staphylococcus aureus*. *J. Biol. Chem.* **277**, 8279–8289 (2002).
5. Rozek, A., Friedrich, C. L. & Hancock, R. E. W. Structure of the bovine antimicrobial peptide indolicidin bound to dodecylphosphocholine and sodium dodecyl sulfate micelles. *Biochemistry* **39**, 15765–15774 (2000).
6. Wang, G. Structures of human host defense cathelicidin LL-37 and its smallest antimicrobial peptide KR-12 in lipid micelles. *J. Biol. Chem.* **283**, 32637–32643 (2008).
7. Gottler, L. M. & Ramamoorthy, A. Structure, membrane orientation, mechanism, and function of pexiganan - A highly potent antimicrobial peptide designed from magainin. *Biochim. Biophys. Acta - Biomembr.* **1788**, 1680–1686 (2009).
8. Bechinger, B., Zasloff, M. & Opella, S. J. Structure and dynamics of the antibiotic peptide PGLa in membranes by solution and solid-state nuclear magnetic resonance spectroscopy. *Biophys. J.* **74**, 981–987 (1998).
9. Syvitski, R. T., Burton, I., Mattatall, N. R., Douglas, S. E. & Jakeman, D. L. Structural characterization of the antimicrobial peptide pleurocidin from winter flounder. *Biochemistry* **44**, 7282–7293 (2005).
10. Agerberth, B. *et al.* Amino acid sequence of PR-39. Isolation from pig intestine of a new member of the family of proline-arginine-rich antibacterial peptides. *Eur. J. Biochem.* **202**, 849–54 (1991).
11. Gatewood, J. M., Schroth, G. P., Schmid, C. W. & Bradbury, E. M. Zinc-induced secondary structure transitions in human sperm protamines. *J. Biol. Chem.* **265**, 20667–72 (1990).
12. Pristovšek, P. & Kidrič, J. Solution structure of polymyxins B and E and effect of binding to lipopolysaccharide: An NMR and molecular modeling study. *J. Med. Chem.* **42**, 4604–4613 (1999).
13. Loose, C., Jensen, K., Rigoutsos, I. & Stephanopoulos, G. A linguistic model for the rational design of antimicrobial peptides. *Nature* **443**, 867–9 (2006).
14. Miyata, T. *et al.* Antimicrobial peptides, isolated from horseshoe crab hemocytes, tachyplesin II, and polyphemusins I and II: chemical structures and biological activity. *J. Biochem.* **106**, 663–8 (1989).
